# Supplementary material
Source: PubMed Central journal article supplement (PMC5527254)
Supplement: ajtr0009-3399-f6.pdf [file ajtr0009-3399-f6.pdf]

## Anti-tumor efficacy evaluation of anti-ASCT2 antibody using gastric cancer PDX

**Supplementary Table 1.** Clinical data of patients used for establishment of gastric cancer patient-derived xenograft mouse models

| PDX line                                           | Gross description of tumor                                                                                                                                                                                                                                                                                                                                                                                                                                                            | Microscopic description                                                                                                                                                                                                                                                                                                                                                                                                                                                                                 |
|----------------------------------------------------|---------------------------------------------------------------------------------------------------------------------------------------------------------------------------------------------------------------------------------------------------------------------------------------------------------------------------------------------------------------------------------------------------------------------------------------------------------------------------------------|---------------------------------------------------------------------------------------------------------------------------------------------------------------------------------------------------------------------------------------------------------------------------------------------------------------------------------------------------------------------------------------------------------------------------------------------------------------------------------------------------------|
| GC119 (Female, 81 years old, Chinese)              | <p>Location: Along lesser curve and involving posterior antrum and focally extending to anterior antrum</p> <p>Perforation: No</p> <p>Size (maximum diameter): 9.0 × 8.5 cm</p> <p>Depth of invasion: Muscularis propria</p> <p>Other Pathology:</p> <ul style="list-style-type: none"> <li>● Chronic gastritis with antral intestinal metaplasia</li> <li>● High grade dysplasia is present at the edge of the tumor</li> <li>● Lymph node metastasis are present (20/31)</li> </ul> | <p>Histological tumor type: Adenocarcinoma</p> <p>Histological pattern:</p> <ul style="list-style-type: none"> <li>- WHO classification: Mixed mucinous (approximately 50%), tubular and papillary adenocarcinoma with focal solid areas.</li> <li>- Lauren Classification: Intestinal type</li> </ul> <p>Histological grade: Moderately differentiated (There are areas ranging from well to moderately differentiated, with focal more solid, cribriformed areas suggestive of higher grade.) pT3</p> |
| GC117 (Female, 73 years old, Chinese, TS1 treated) | <p>Location: Antrum</p> <p>Perforation: No</p> <p>Size: 5.5 × 3.0 × 1.0 cm</p> <p>Depth of invasion: Subserosa</p> <p>Other Pathology:</p> <ul style="list-style-type: none"> <li>● Tumor invades subserosa, pT3</li> <li>● 3 out of 41 lymph nodes positive for metastatic carcinoma (pN2)</li> </ul>                                                                                                                                                                                | <p>Histological tumor type: Adenocarcinoma,</p> <p>Histological pattern:</p> <ul style="list-style-type: none"> <li>- WHO classification: Tubular</li> <li>- Lauren classification: Intestinal</li> </ul> <p>Histological grade: (Only for WHO tubular carcinoma): Poorly differentiated (5-49% gland formation)</p>                                                                                                                                                                                    |
| GC127 (Male, 78 years old, other race)             | <p>Location: gastro-oesophageal junction</p> <p>Perforation: No</p> <p>Size: 3.5 × 3.0 cm</p> <p>Depth of invasion: Muscularis propria</p> <p>Other Pathology:</p> <ul style="list-style-type: none"> <li>● Twelve lymph nodes with no evidence of metastatic carcinoma (0/12)</li> </ul>                                                                                                                                                                                             | <p>Histological tumor type: Adenocarcinoma.</p> <p>Histological pattern:</p> <ul style="list-style-type: none"> <li>- WHO classification: tubular carcinoma</li> <li>- Lauren classification: Intestinal.</li> </ul> <p>Histological grade: Moderately to poorly differentiated</p>                                                                                                                                                                                                                     |
| GC84 (Male, 93 years old, Chinese)                 | <p>Location: Incisura</p> <p>Perforation: No</p> <p>Size: 6.0 × 5.5 × 1.2 cm (depth)</p> <p>Depth of invasion: Beyond muscularis mucosa and less than 0.1 cm from serosa</p> <p>Other Pathology:</p> <ul style="list-style-type: none"> <li>● Background of H. pylori-associated chronic active gastritis with intestinal metaplasia</li> <li>● Omentum negative for carcinoma</li> <li>● 21 lymph nodes without metastatic carcinoma (0/21)</li> </ul>                               | <p>Histological tumor type: Adenocarcinoma</p> <p>Histological pattern:</p> <ul style="list-style-type: none"> <li>- WHO classification: Tubular/solid type</li> <li>- Lauren classification: Intestinal type</li> </ul> <p>Histological grade: Poorly differentiated</p>                                                                                                                                                                                                                               |
| GC113 (Female, 77 years old, Chinese)              | <p>Location: Posterior wall of the antrum</p> <p>Perforation: No</p> <p>Size: 4.5 × 3.0 × 1.0 cm</p> <p>Depth of invasion: Submucosa</p> <p>Other Pathology:</p> <ul style="list-style-type: none"> <li>● Lymphovascular invasion is present</li> <li>● Lymph nodes negative for metastatic carcinoma (0/40), pN0</li> </ul>                                                                                                                                                          | <p>Histological tumor type: Adenocarcinoma</p> <p>Histological pattern:</p> <ul style="list-style-type: none"> <li>- WHO classification: Tubular</li> <li>- Lauren classification: Intestinal type</li> </ul> <p>Histological grade: Moderately differentiated</p>                                                                                                                                                                                                                                      |
